# Supplementary material for: Aerosol optical properties derived from POLDER-3/PARASOL (2005–2013) over the western Mediterranean Sea – Part 2: Spatial distribution and temporal variability
Source: Copernicus journal article supplement (doi:10.5194/acp-2020-1155), 2021-03-17
Supplement: Supplementary file 1 [file acp-2020-1155-supplement.pdf]

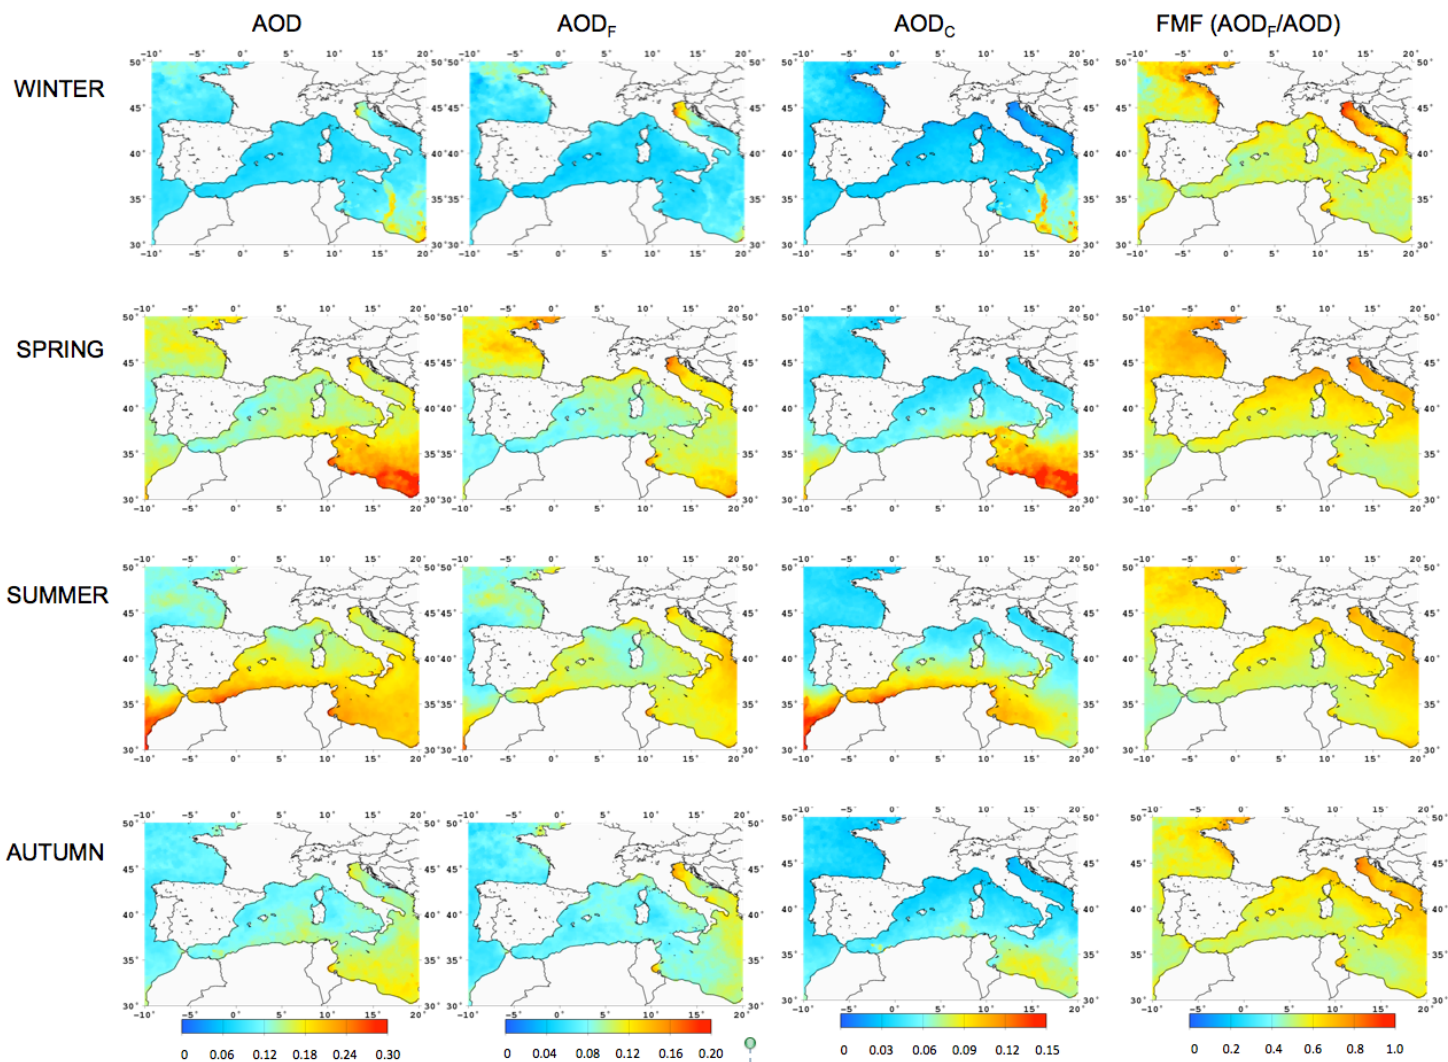

**Figure S1.** Climatological seasonal maps for AOD, AOD<sub>F</sub>, AOD<sub>C</sub>, FMF (AOD<sub>F</sub>/AOD) retrieved by POLDER-3 at 550 nm over the period March 2005–October 2013. Seasons are ordered from the top to the bottom: Winter is December–January–February, Spring March–April–May, Summer June–July–August, Autumn September–October–November.

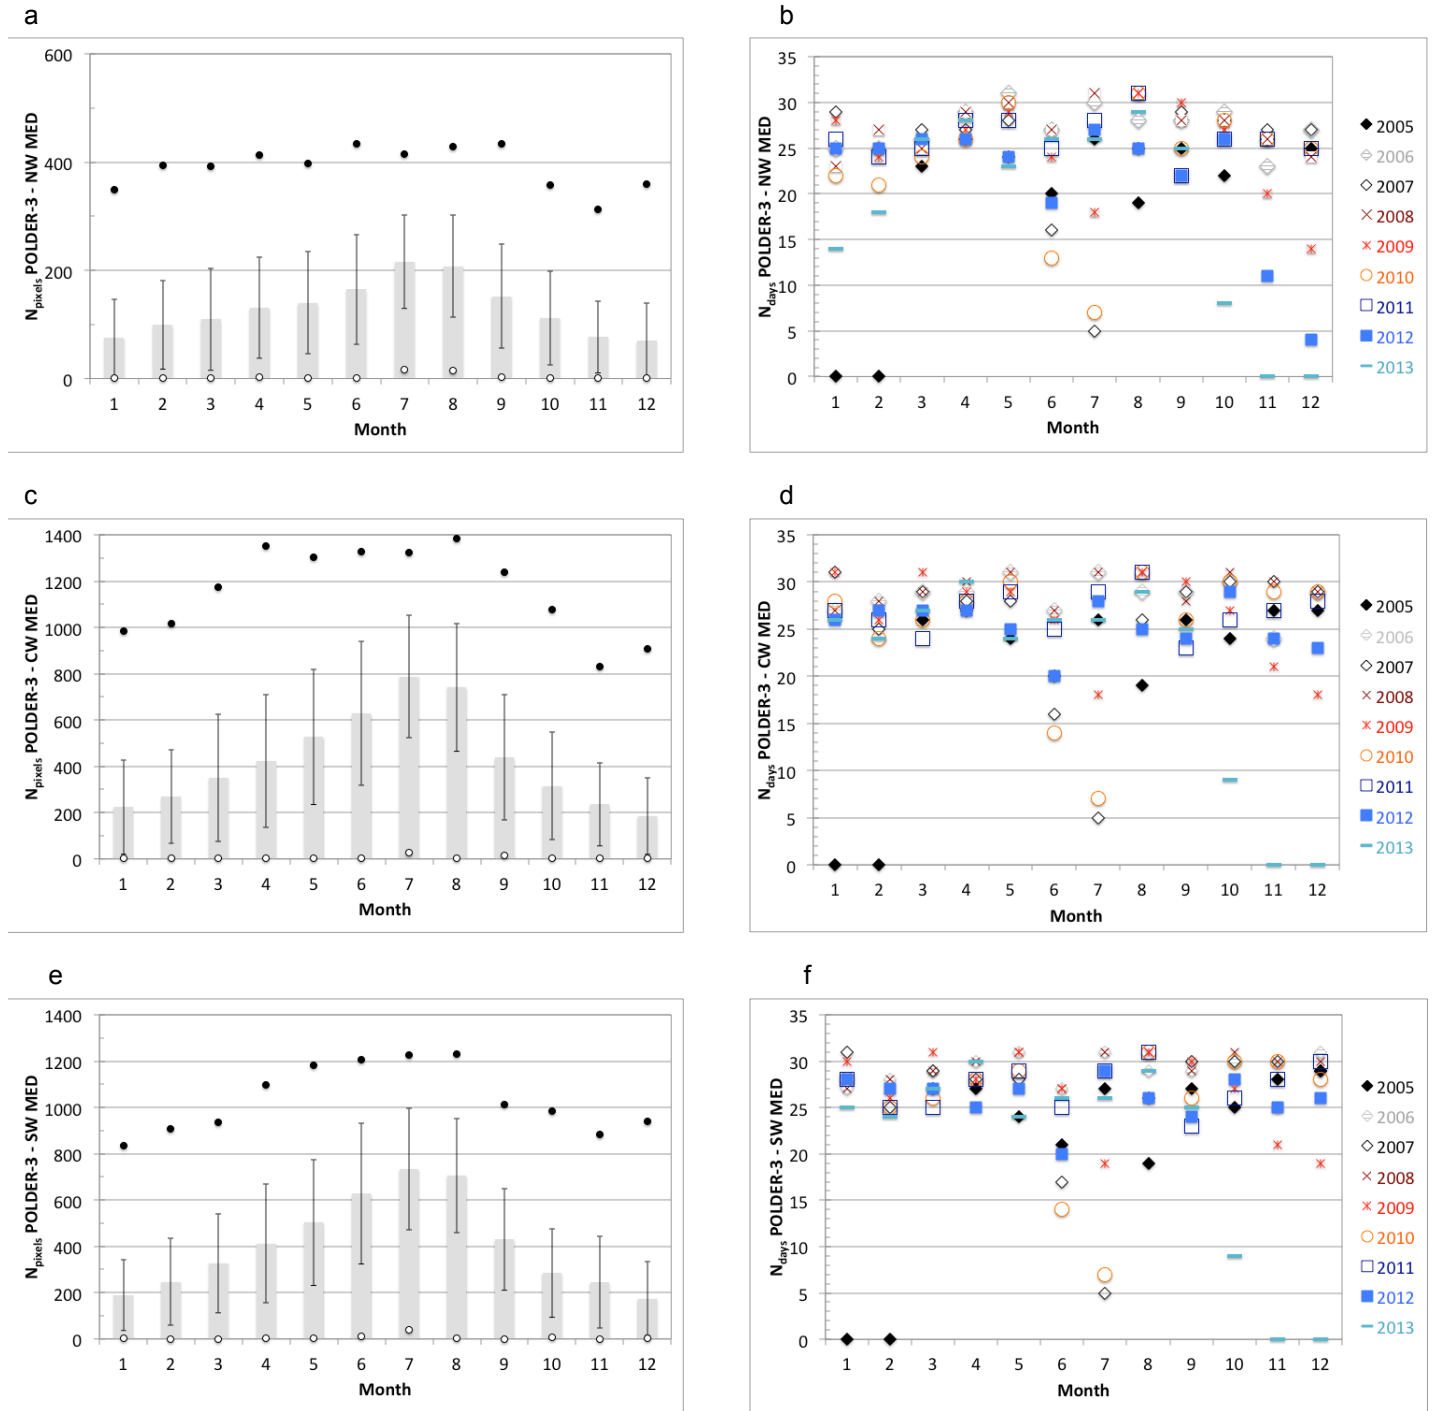

**Figure S2.** Statistics of available POLDER-3 clear-sky pixels. Left column, the average number for each month over the period March 2005 – October 2013 for the NW MED (a), CW MED (c), and SW MED (e) sub-regions (defined in Figure 2). Standard-deviations, maximum (filled circles) and minimum (open circles) number of pixels are reported. Bars represent the standard deviations. Right column, number of days with POLDER-3 observations available by month and by year for the NW MED (b), CW MED (d), and SW MED (f) sub-regions.

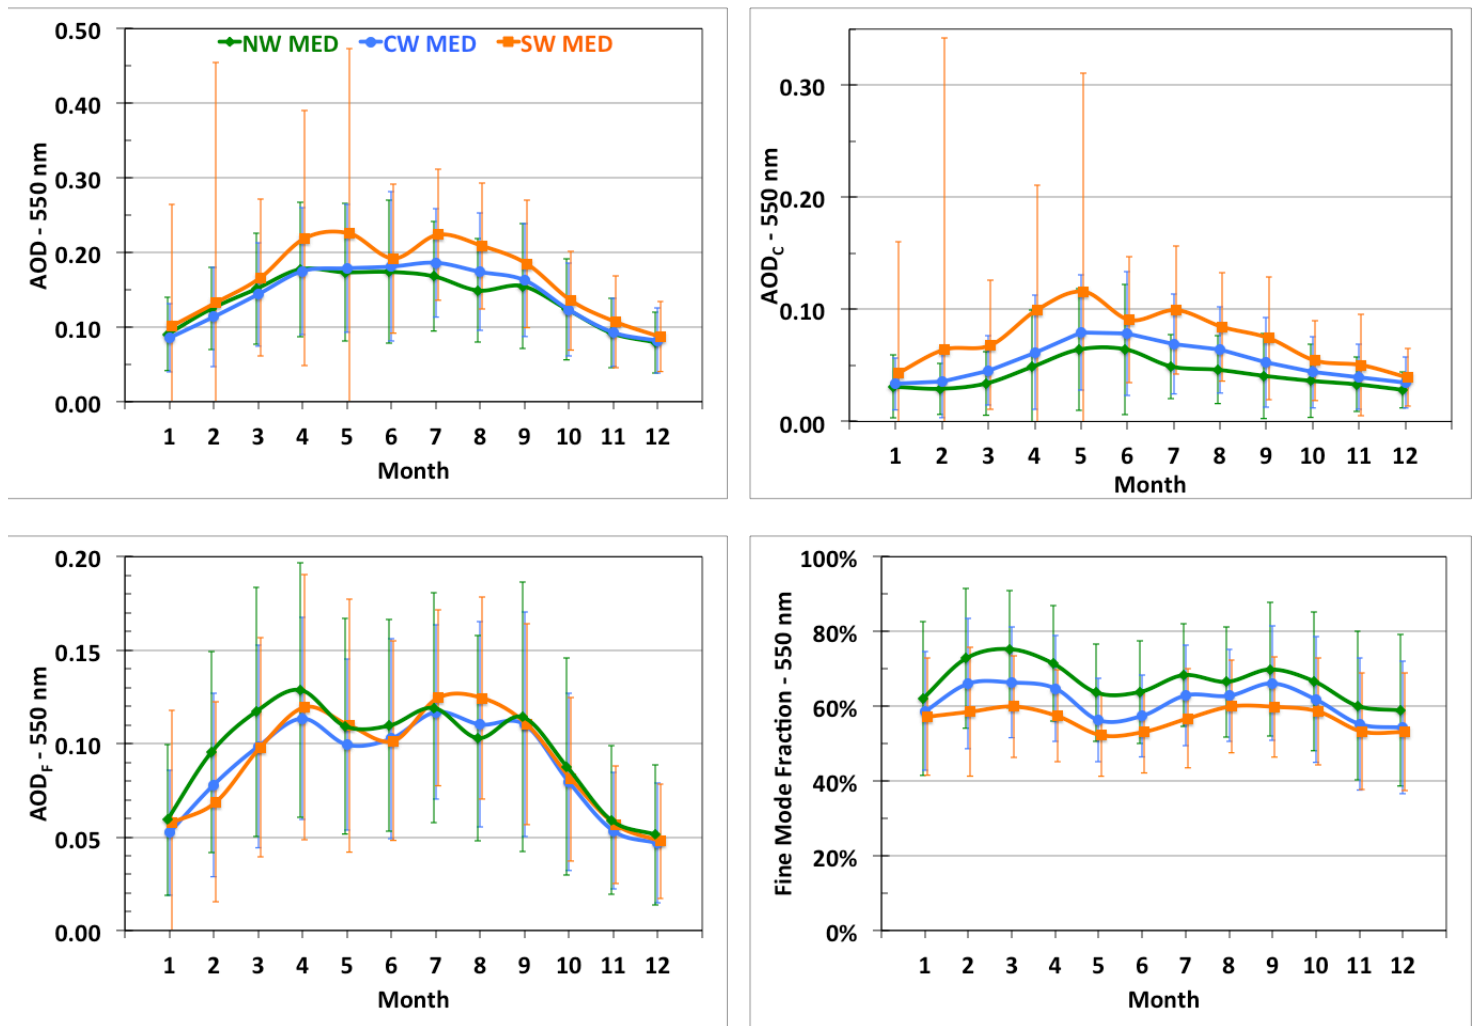

**Figure S3.** The 9-year (March 2005 – October 2013) climatological seasonal cycle of AOD (top) and AOD<sub>Fine</sub> (bottom) in left column, AOD<sub>Coarse</sub> (top) and Fine Mode Fraction (bottom) in right column, derived from POLDER-3 at 550 nm. The green, blue, orange curves are respectively for the north (NW MED), central (CW MED), and south (SW MED) parts of western Mediterranean basins (defined in Figure 2).

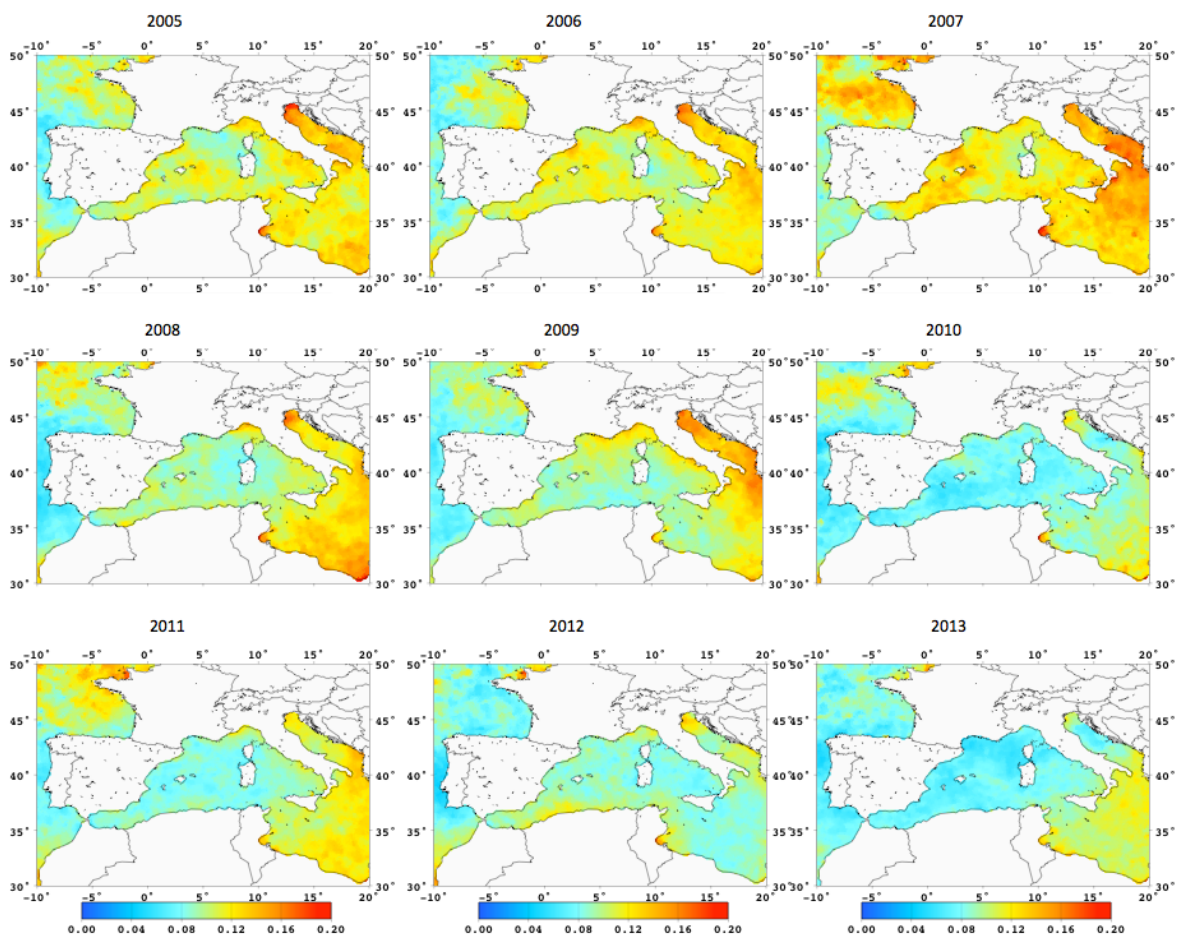

**Figure S4.** March-October annual averages of POLDER-3 AOD<sub>F</sub> at 550 nm from 2005 to 2013.

| Trend per year<br>Region | AOD 550 nm                 |                            | AOD <sub>COARSE</sub> 550 nm |                           | AOD <sub>FINE</sub> 550 nm |                            |
|--------------------------|----------------------------|----------------------------|------------------------------|---------------------------|----------------------------|----------------------------|
|                          | Annual means               | Monthly anomalies          | Annual means                 | Monthly anomalies         | Annual means               | Monthly anomalies          |
| NW MED                   | <b>- 0.0059 ± 0.0016**</b> | <b>- 0.0058 ± 0.0009**</b> | - 0.0008 ± 0.0008            | <b>- 0.0009 ± 0.0004*</b> | <b>- 0.0051 ± 0.0013**</b> | <b>- 0.0049 ± 0.0008**</b> |
| CW MED                   | <b>- 0.0060 ± 0.0014**</b> | <b>- 0.0059 ± 0.0009**</b> | - 0.0012 ± 0.0007            | <b>- 0.0012 ± 0.0005*</b> | <b>- 0.0049 ± 0.0011**</b> | <b>- 0.0047 ± 0.0007**</b> |
| SW MED                   | <b>- 0.0054 ± 0.0022*</b>  | <b>- 0.0061 ± 0.0014**</b> | - 0.0017 ± 0.0014            | <b>- 0.0022 ± 0.0009*</b> | <b>- 0.0037 ± 0.0011*</b>  | <b>- 0.0040 ± 0.0007**</b> |

**Table S1.** POLDER-3 550 nm AOD, AOD<sub>COARSE</sub> and AOD<sub>FINE</sub> trends per year derived from March-October annual means and monthly mean anomalies over the 2005-2013 period for NW MED, CW MED, SW MED. The corresponding annual evolutions are shown in Figure 8. Trends (year<sup>-1</sup>) are shown with their standard deviations (± 1s). Values in bold indicate statistically significant trends at \* 95% confidence level and \*\* 99% confidence level, as determined by the Student t-test.

| Trend per year<br>Station | AOD 550 nm                 |                            | AOD <sub>COARSE</sub> 550 nm |                   | AOD <sub>FINE</sub> 550 nm |                            |
|---------------------------|----------------------------|----------------------------|------------------------------|-------------------|----------------------------|----------------------------|
|                           | Annual means               | Monthly anomalies          | Annual means                 | Monthly anomalies | Annual means               | Monthly anomalies          |
| Ersa                      | <b>- 0.0068 ± 0.0016**</b> | <b>- 0.0059 ± 0.0010**</b> | - 0.0009 ± 0.0010            | - 0.0008 ± 0.0007 | <b>- 0.0059 ± 0.0008**</b> | <b>- 0.0051 ± 0.0009**</b> |
| Barcelona                 | <b>- 0.0088 ± 0.0025*</b>  | <b>- 0.0082 ± 0.0014**</b> | - 0.0017 ± 0.0015            | - 0.0015 ± 0.0008 | <b>- 0.0071 ± 0.0014**</b> | <b>- 0.0067 ± 0.0010**</b> |
| Lampedusa                 | - 0.0054 ± 0.0030          | <b>- 0.0043 ± 0.0020*</b>  | - 0.0016 ± 0.0023            | - 0.0006 ± 0.0014 | <b>- 0.0038 ± 0.0008**</b> | <b>- 0.0037 ± 0.0009**</b> |

**Table S2.** POLDER-3 550 nm AOD, AOD<sub>COARSE</sub> and AOD<sub>FINE</sub> trends per year derived from March-October annual means and monthly mean anomalies over the 2005-2013 period for Ersa, Barcelona, and Lampedusa. The corresponding annual evolutions are shown in Figure 9. Trends (year<sup>-1</sup>) are shown with their standard deviations (± 1s). Values in bold indicate statistically significant trends at \* 95% confidence level and \*\* 99% confidence level, as determined by the Student t-test.
